# Supplementary material for: Process Evaluation of the BOOST-A™ Transition Planning Program for Adolescents on the Autism Spectrum: A Strengths-Based Approach
Source: Springer Nature journal article supplement (doi:10.1007/s10803-017-3317-8), 2017-10-10
Supplement: MOESM1 [file 15125804]

**Interview Guide**

1. Please describe your **experience** of using the BOOST-A in preparing you/your child for leaving school.

*Prompts: What goals have you achieved, any ways you may have benefited, connections you have made and was the adolescent involved in the process.*

*What did you and your child get out of the BOOST-A?*

1. Can you describe how easy it was to use the BOOST-A?

*Prompts: Instructions, access, technical issues, how often did you use it*

1. Please describe anything that **facilitated** successful use of the BOOST-A?

*Prompts: Any helpful elements of the BOOST-A, any particular people or settings.*

1. Please describe anything that caused **barriers** or limited use of the BOOST-A?

*Prompts: Any challenges, recommended changes to the BOOST-A to address barriers.*

1. Do you have any other comments about the BOOST-A?
